# Supplementary material for: The impact of atmospheric dynamics on vertical cloud overlap over the Tibetan Plateau
Source: Copernicus journal article supplement (doi:10.5194/acp-2017-642), 2017-08-01
Supplement: Supplementary file 1 [file acp-2017-642-supplement.pdf]

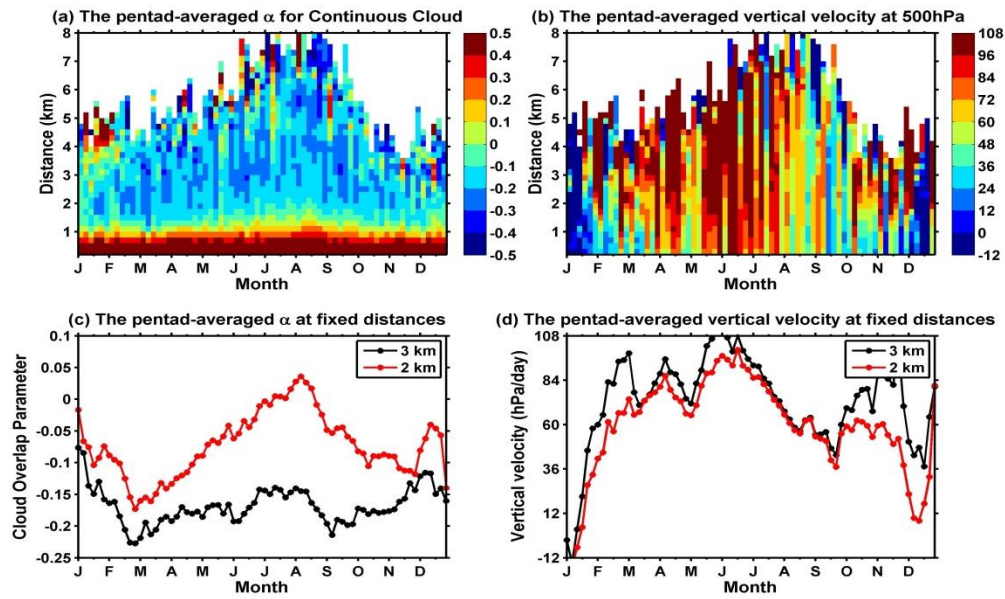

Figure S1. (a) and (b) The seasonal variations of the pentad-averaged cloud overlap parameter  $\alpha$ , and vertical velocity at 500hPa for the continuous clouds over the TP; (c) and (d) The seasonal variations of the pentad-averaged  $\alpha$  and vertical velocity for the continuous clouds at given layer distances (red: 2km; black: 3km). Here, positive velocity: updraft; negative velocity: subsidence;

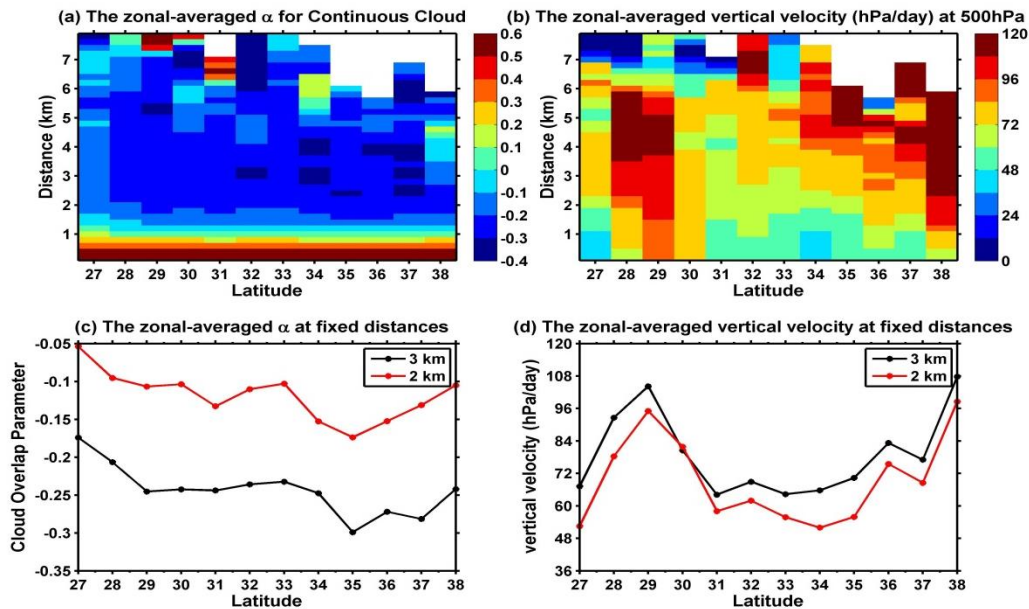

Figure S2. (a) and (b) The zonal variations of the  $\alpha$  and vertical velocity at 500hPa for the continuous clouds over the TP; (c) and (d) The zonal variations of the  $\alpha$  and vertical velocity for the continuous clouds at given layer distances (red: 2km; black: 3km). Here, positive velocity: updraft; negative velocity: subsidence;

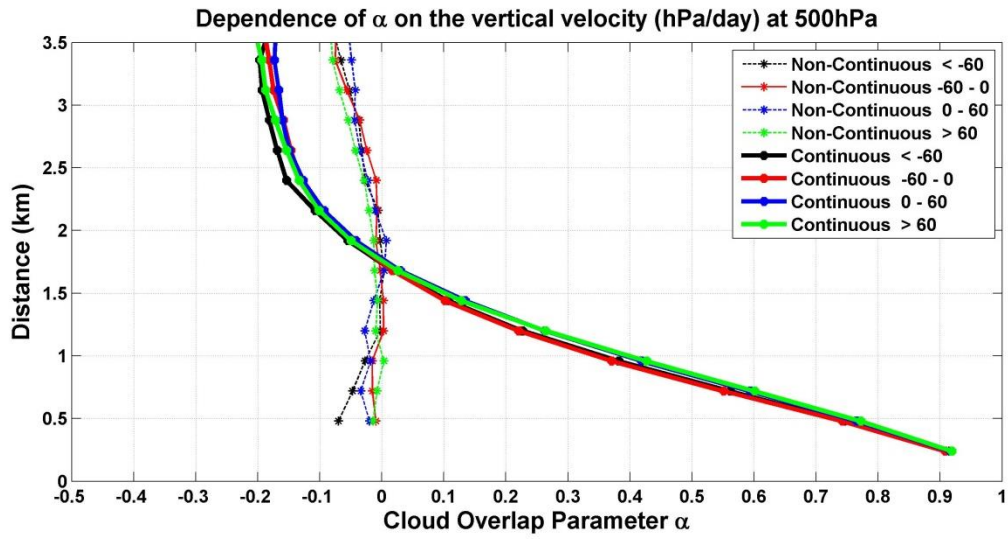

Figure S3. The variation of overlap parameter  $\alpha$  with layer distance under different vertical velocity at 500hPa for given upper limit thresholds of cloud cover (50%). Here, positive velocity: updraft; negative velocity: subsidence;
